# Supplementary material
Source: publisher figshare collection journal article supplement (https://karger.figshare.com/ndownloader/files/14570654)
Supplement: Supplementary file 1 [file 14570654]

**Supplementary:**

**Supplementary Table 1:** Basic characteristics of the screening and validation cohorts. Marrow blasts, hemoglobin, neutrophil and platelet count expressed as the median (range).

|                           | Screening cohort | Validation cohort patients | Validation cohort controls |
|---------------------------|------------------|----------------------------|----------------------------|
| <b>Number of patients</b> | 16               | 200                        | 216                        |
| <b>Sex (M/F)</b>          | 9/7<br>(56%/44%) | 115/85<br>(58%/42%)        | 110/106<br>(51%/49%)       |
| <b>Age median (years)</b> | 65 (39-82)       | 69 (19-85)                 | 64 (21-98)                 |
| <b>Marrow blasts (%)</b>  | 8.4 (0.6-18.8)   | 4.0 (0.0-60.0)             | --                         |
| <b>Hemoglobin (g/dl)</b>  | 9.8 (8.3-13.2)   | 9.4 (6.5-15.3)             | --                         |
| <b>Neutrophils (G/l)</b>  | 0.8 (0.20-11.39) | 1.48 (0.08-60.6)           | --                         |
| <b>Platelets (G/l)</b>    | 120 (36-504)     | 116 (8-734)                | --                         |
| <b>MDS subtype</b>        |                  |                            |                            |
| RA/RN                     | 0 (0%)           | 15 (8%)                    |                            |
| RARS                      | 0 (0%)           | 5 (2%)                     |                            |
| MDS with del5q            | 0 (0%)           | 15 (8%)                    |                            |
| RCMD                      | 5 (31%)          | 68 (34%)                   |                            |
| RAEB-1                    | 4 (25%)          | 20 (10%)                   |                            |
| RAEB-2                    | 7 (44%)          | 46 (23%)                   |                            |
| secondary AML             | 0 (0%)           | 20 (10%)                   |                            |
| CMML                      | 0 (0%)           | 11 (5%)                    |                            |
| <b>IPSS-R</b>             |                  |                            |                            |
| very low                  | 0 (0%)           | 29 (14%)                   |                            |
| low                       | 1 (6%)           | 43 (21%)                   |                            |
| intermediate              | 4 (25%)          | 45 (23%)                   |                            |
| high                      | 7 (44%)          | 37 (18%)                   |                            |
| very high                 | 4 (25%)          | 22 (11%)                   |                            |
| NA                        | --               | 24 (12%)                   |                            |
| <b>Karyotype</b>          |                  |                            |                            |
| very good / good          | 4 (25%)          | 114 (57%)                  |                            |
| intermediate              | 7 (44%)          | 40 (20%)                   |                            |
| poor / very poor          | 5 (31%)          | 24 (12%)                   |                            |
| NA                        | --               | 22 (11%)                   |                            |

**Supplementary Table 2:**

List of 84 genes selected for targeted enrichment resequencing and for expression profiling using Qiagen RT<sup>2</sup> Profiler PCR DNA Repair Array.

|                                                                                                                                                                                                           |
|-----------------------------------------------------------------------------------------------------------------------------------------------------------------------------------------------------------|
| <b>Base Excision Repair (BER):</b> APEX1, APEX2, CCNO, LIG3, MPG, MUTYH, NEIL1, NEIL2, NEIL3, NTHL1, OGG1, PARP1, PARP2, PARP3, POLB, SMUG1, TDG, UNG, XRCC1.                                             |
| <b>Nucleotide Excision Repair (NER):</b> ATXN3, BRIP1, CCNH, CDK7, DDB1, DDB2, ERCC1, ERCC2, ERCC3, ERCC4, ERCC5, ERCC6, ERCC8, LIG1, MMS19, PNKP, POLL, RAD23A, RAD23B, RPA1, RPA3, SLK, XAB2, XPA, XPC. |
| <b>Mismatch Repair (MMR):</b> MLH1, MLH3, MSH2, MSH3, MSH4, MSH5, MSH6, PMS1, PMS2, POLD3, TREX1.                                                                                                         |
| <b>Double-Strand Break (DSB) Repair:</b> BRCA1, BRCA2, DMC1, FEN1, LIG4, MRE11A, PRKDC, RAD21, RAD50, RAD51, RAD51C, RAD51B, RAD51D, RAD52, RAD54L, XRCC2, XRCC3, XRCC4, XRCC5, XRCC6.                    |
| <b>Other Genes Related to DNA Repair:</b> ATM, ATR, EXO1, MGMT, RAD18, RFC1, TOP3A, TOP3B, XRCC6BP1.                                                                                                      |

**Supplementary Table 3:**

a) Missense SNPs in DNA repair genes identified by targeted enrichment resequencing as significantly associated with MDS susceptibility. HapMap-CEU population was used as a control group for odds ratio calculation. b) Within the group of patients with poor and very poor cytogenetics according to IPSS-R, significant increase of dependence of these polymorphisms and the presence of MDS was observed. (MAF - minor allele frequency, 95% CI- confidence interval for odds ratio, p-value of calculated odds ratios)

| <b>Table 3a - all patients</b>                              |            |                 |                     |                   |                   |                |                |
|-------------------------------------------------------------|------------|-----------------|---------------------|-------------------|-------------------|----------------|----------------|
| <b>Gene</b>                                                 | <b>SNP</b> | <b>Genotype</b> | <b>MAF patients</b> | <b>MAF HapMAP</b> | <b>Odds ratio</b> | <b>95% CI</b>  | <b>p-value</b> |
| <i>MLH1</i>                                                 | rs1799977  | A/G             | 0.50                | 0.35              | 1.857             | 1.052 - 3.278  | 0.0449         |
| <i>CCNH</i>                                                 | rs2230641  | A/G             | 0.37                | 0.20              | 2.349             | 1.243 - 4.440  | 0.0118         |
| <i>ERCC6</i>                                                | rs2228529  | T/C             | 0.34                | 0.20              | 2.061             | 1.085 - 3.914  | 0.0378         |
| <i>ERCC6</i>                                                | rs2228526  | T/C             | 0.35                | 0.20              | 2.154             | 1.136 - 4.083  | 0.0261         |
| <i>MGMT</i>                                                 | rs12917    | C/T             | 0.27                | 0.10              | 3.329             | 1.513 - 7.325  | 0.0032         |
| <i>TDG</i>                                                  | rs4135113  | G/A             | 0.12                | 0.03              | 4.409             | 1.204 - 16.150 | 0.0287         |
| <b>Table 3b - patients with poor/very poor cytogenetics</b> |            |                 |                     |                   |                   |                |                |
| <b>Gene</b>                                                 | <b>SNP</b> | <b>Genotype</b> | <b>MAF patients</b> | <b>MAF HapMAP</b> | <b>Odds ratio</b> | <b>95% CI</b>  | <b>p-value</b> |
| <i>MLH1</i>                                                 | rs1799977  | A/G             | 0.75                | 0.35              | 5.571             | 3.023 - 10.270 | <0.0001        |
| <i>CCNH</i>                                                 | rs2230641  | A/G             | 0.61                | 0.20              | 6.256             | 3.319 - 11.790 | <0.0001        |
| <i>ERCC6</i>                                                | rs2228529  | T/C             | 0.51                | 0.20              | 4.163             | 2.222 - 7.799  | <0.0001        |
| <i>ERCC6</i>                                                | rs2228526  | T/C             | 0.51                | 0.20              | 4.163             | 2.222 - 7.799  | <0.0001        |
| <i>MGMT</i>                                                 | rs12917    | C/T             | 0.48                | 0.10              | 8.308             | 3.877 - 17.800 | <0.0001        |
| <i>TDG</i>                                                  | rs4135113  | G/A             | 0.23                | 0.03              | 9.658             | 2.795 - 33.380 | <0.0001        |

**Supplementary Table 4:**

a) In the population study, none of previously selected SNPs was confirmed as associated with MDS susceptibility. Samples of hematologically healthy controls were used as a control group for odds ratio calculation. b) Detailed analysis of patients with poor and very poor cytogenetics. Polymorphism in gene *MLH1* rs1799977 was associated with MDS in the group of patients with poor and very poor cytogenetics as defined by IPSS-R. (MAF - variant allele frequency, 95% CI- confidence interval for odds ratio, p-value of calculated odds ratios)

| <b>Table 4a - all patients</b>                              |            |                 |                     |                    |                   |                |                |
|-------------------------------------------------------------|------------|-----------------|---------------------|--------------------|-------------------|----------------|----------------|
| <b>Gene</b>                                                 | <b>SNP</b> | <b>Genotype</b> | <b>MAF patients</b> | <b>MAF control</b> | <b>Odds ratio</b> | <b>95% CI</b>  | <b>p-value</b> |
| <i>MLH1</i>                                                 | rs1799977  | A/G             | 0.33                | 0.30               | 1.149             | 0.632 - 2.089  | 0.7609         |
| <i>CCNH</i>                                                 | rs2230641  | A/G             | 0.24                | 0.27               | 0.854             | 0.452 - 1.614  | 0.8538         |
| <i>ERCC6</i>                                                | rs2228529  | T/C             | 0.24                | 0.27               | 0.854             | 0.452 - 1.614  | 0.8538         |
| <i>ERCC6</i>                                                | rs2228526  | T/C             | 0.24                | 0.27               | 0.854             | 0.452 - 1.614  | 0.8538         |
| <i>MGMT</i>                                                 | rs12917    | C/T             | 0.16                | 0.19               | 0.8120            | 0.391 - 1.688  | 0.7102         |
| <i>TDG</i>                                                  | rs4135113  | G/A             | 0.03                | 0.01               | 3.062             | 0.313 - 29.960 | 0.6212         |
| <b>Table 4b - patients with poor/very poor cytogenetics</b> |            |                 |                     |                    |                   |                |                |
| <b>Gene</b>                                                 | <b>SNP</b> | <b>Genotype</b> | <b>MAF patients</b> | <b>MAF control</b> | <b>Odds ratio</b> | <b>95% CI</b>  | <b>p-value</b> |
| <i>MLH1</i>                                                 | rs1799977  | A/G             | 0.55                | 0.30               | 2.870             | 1.594 - 5.102  | 0.0004         |
| <i>CCNH</i>                                                 | rs2230641  | A/G             | 0.26                | 0.27               | 0.9499            | 0.507 - 1.781  | 1.0000         |
| <i>ERCC6</i>                                                | rs2228529  | T/C             | 0.26                | 0.27               | 0.9499            | 0.507 - 1.781  | 1.0000         |
| <i>ERCC6</i>                                                | rs2228526  | T/C             | 0.26                | 0.27               | 0.9499            | 0.507 - 1.781  | 1.0000         |
| <i>MGMT</i>                                                 | rs12917    | C/T             | 0.14                | 0.19               | 0.6940            | 0.326 - 1.476  | 0.4464         |
| <i>TDG</i>                                                  | rs4135113  | G/A             | 0.07                | 0.01               | 7.452             | 0.899 - 61.760 | 0.0649         |
